# Supplementary material
Source: PubMed Central journal article supplement (PMC2373409)
Supplement: rsif20060201s02.pdf [file rsif20060201s02.pdf]

# Supplementary information to de Lussanet and Muller: The smaller your mouth, the longer your snout

List of the measured parameters. Most specimens were borrowed from the collection of the Museum Naturalis, Leiden (NL), indicated by the collection no. Some of these specimens were old (dating back to the 19th century). Where possible, we followed the scientific nomenclature from [fishbase.org](http://fishbase.org). In cases where the collection name was outdated or incorrect, the collection name is listed as well. *Siphostoma californiense* is not listed in [fishbase.org](http://fishbase.org), but could possibly be *Syngnathus californiensis*. Specimens of the same species are ordered by snout length ( $l$ ).  $R$  was estimated, based on the centres of rotation in Fig. 1, as  $R = 0.75H$  for *C.scutatus* and *Hippocampus*, and  $R = L$  in the other specimens. The smallest and largest *S. acus* are the filmed ones. Parameter  $r$  was neglected. For the filmed specimens we also computed the optimal snout length numerically, using the exact centres of rotation and by computing the volumes and moments of inertia as a series of 50 elliptical discs from the neck joint to the tip of the snout. These simulations gave the same result (i.e. well within the measurement error). All measurements are in millimetres.

| Species                           | Collection name                 | Collection no. | SL  | l     | h     | w    | L    | H     | W    |
|-----------------------------------|---------------------------------|----------------|-----|-------|-------|------|------|-------|------|
| <i>Hippocampus abdominalis</i>    |                                 | 7255           | 262 | 27.08 | 3.38  | 2.64 | 13.6 | 18.37 | 10.0 |
| <i>Hippocampus comes</i>          |                                 | 3923B          | 146 | 18.81 | 2.66  | 1.84 | 7.9  | 10.69 | 5.9  |
| <i>Hippocampus erectus</i>        | <i>H. punctulatus</i>           | 23497A         | 239 | 27.43 | 4.29  | 3.60 | 13.5 | 17.24 | 10.6 |
| <i>Hippocampus guttulatus</i>     |                                 | 5167C          | 70  | 11.97 | 2.00  | 1.12 | 5.1  | 7.97  | 3.3  |
| <i>Hippocampus guttulatus</i>     |                                 | 5167D          | 80  | 12.46 | 1.99  | 1.36 | 6.0  | 8.78  | 4.1  |
| <i>Hippocampus guttulatus</i>     |                                 | 5167E          | 90  | 13.78 | 2.25  | 1.36 | 7.0  | 9.70  | 5.0  |
| <i>Hippocampus guttulatus</i>     |                                 | 5167I          | 140 | 19.39 | 3.31  | 2.08 | 9.6  | 13.48 | 6.9  |
| <i>Hippocampus guttulatus</i>     | <i>H. longirostris</i>          | 3911           | 135 | 19.71 | 2.45  | 1.60 | 7.2  | 10.01 | 5.2  |
| <i>Hippocampus guttulatus</i>     |                                 | 5167F          | 130 | 20.60 | 3.27  | 1.68 | 8.9  | 12.97 | 6.1  |
| <i>Hippocampus guttulatus</i>     |                                 | 5167G          | 130 | 20.78 | 3.48  | 2.24 | 9.9  | 13.69 | 7.1  |
| <i>Hippocampus guttulatus</i>     |                                 | 5167H          | 135 | 21.85 | 3.21  | 1.84 | 9.0  | 13.35 | 6.1  |
| <i>Hippocampus guttulatus</i>     |                                 | 5167A          | 180 | 22.41 | 3.34  | 2.00 | 10.3 | 14.40 | 7.3  |
| <i>Hippocampus hippocampus</i>    | <i>H. brevirostris</i>          | 3915A          | 74  | 9.49  | 1.65  | 1.20 | 4.9  | 7.36  | 3.2  |
| <i>Hippocampus hippocampus</i>    |                                 | 19506A         | 99  | 12.22 | 2.03  | 1.60 | 6.2  | 7.60  | 5.0  |
| <i>Hippocampus hippocampus</i>    | <i>H. europaeus</i>             | 16444A         | 155 | 15.74 | 3.29  | 2.40 | 9.6  | 12.36 | 7.4  |
| <i>Hippocampus kuda</i>           |                                 | 17484          | 186 | 27.32 | 4.03  | 3.04 | 11.4 | 14.51 | 9.0  |
| <i>Hippocampus mohnikei</i>       |                                 | 3924           | 86  | 11.03 | 1.88  | 1.20 | 5.9  | 8.53  | 4.1  |
| <i>Syngnathus abaster</i>         | <i>S. bucculentus</i>           | 24370A         | 102 | 10.89 | 1.22  | 1.26 | 3.6  | 3.42  | 3.7  |
| <i>Syngnathus abaster</i>         | <i>S. agassizi</i>              | 3873           | 142 | 13.86 | 1.83  | 0.40 | 3.2  | 2.25  | 4.6  |
| <i>Syngnathus abaster</i>         | <i>S. cuvieri</i>               | 3877A          | 137 | 14.49 | 1.56  | 1.36 | 4.4  | 4.32  | 4.5  |
| <i>Syngnathus abaster</i>         |                                 | 15809C         | 119 | 15.84 | 1.44  | 1.00 | 4.3  | 4.5   | 4.1  |
| <i>S. acus (1st-day juvenile)</i> |                                 | -              | 25  | 1.86  | 0.694 | 0.66 | 1.4  | 1.18  | 1.2  |
| <i>Syngnathus acus</i>            |                                 | -              | 314 | 33.87 | 3.41  | 2.44 | 8.7  | 9.85  | 7.7  |
| <i>Syngnathus acus</i>            |                                 | -              | 309 | 35.07 | 3.08  | 2.25 | 8.5  | 9.48  | 7.7  |
| <i>Syngnathus acus</i>            |                                 | -              | 320 | 35.75 | 3.08  | 2.25 | 9.2  | 9.48  | 7.7  |
| <i>Syngnathus acus</i>            |                                 | -              | 485 | 54.20 | 5.80  | 3.00 | 29.0 | 15.8  | 12.9 |
| <i>Hippichthys cyanospilus</i>    | <i>Syngnathus cyanospilus</i>   | 7228           | 116 | 12.69 | 1.59  | 1.22 | 3.9  | 4.32  | 3.6  |
| <i>Hippichthys penicillus</i>     | <i>Syngnathus argyrostictus</i> | 3849           | 120 | 15.84 | 1.56  | 0.72 | 4.0  | 4.41  | 3.7  |
| <i>Nerophis lumbriciformis</i>    |                                 | -              | 141 | 8.28  | 1.65  | 1.42 | 3.3  | 3.60  | 3.0  |
| <i>Nerophis maculatus</i>         |                                 | 23761          | 214 | 10.17 | 1.09  | 1.09 | 2.8  | 2.88  | 2.8  |
| <i>Nerophis maculatus</i>         | <i>Syngnathus annulatus</i>     | 3856           | 219 | 10.8  | 1.21  | 1.37 | 3.0  | 3.06  | 3.0  |
| <i>Syngnathoides biaculeatus</i>  | <i>Syngnathus biaculeatus</i>   | 3864D          | 199 | 32.5  | 2.91  | 1.40 | 8.0  | 8.75  | 7.3  |
| <i>unknown (see caption)</i>      | <i>Siphostoma californiense</i> | 11585A         | 257 | 29.67 | 2.15  | 0.60 | 6.10 | 6.44  | 5.8  |
| <i>Centriscus scutatus</i>        |                                 | 10452B         | 75  | 31.42 | 1.25  | 1.40 | 4.20 | 6.11  | 2.9  |
| <i>Macrorhamphosus scolopax</i>   |                                 | -              | 151 | 65.1  | 4.35  | 6.9  | 21   | 31.57 | 14   |
